# Supplementary material for: Catalytic enantioselective synthesis of indanes by a cation-directed 5-endo-trig cyclization
Source: Springer Nature journal article supplement (doi:10.1038/nchem.2150), 2015-01-12
Supplement: 41557_2015_BFnchem2150_MOESM8_ESM.mol [file 41557_2015_BFnchem2150_MOESM8_ESM.mol]

  ChemDraw12171405432D

 33 35  0  0  0  0  0  0  0  0999 V2000
   -2.6656    0.6191    0.0000 C   0  0  0  0  0  0  0  0  0  0  0  0
   -2.6656   -0.2087    0.0000 C   0  0  0  0  0  0  0  0  0  0  0  0
   -1.9487   -0.6226    0.0000 C   0  0  0  0  0  0  0  0  0  0  0  0
   -1.2319   -0.2087    0.0000 C   0  0  0  0  0  0  0  0  0  0  0  0
   -1.2319    0.6191    0.0000 C   0  0  0  0  0  0  0  0  0  0  0  0
   -1.9487    1.0331    0.0000 C   0  0  0  0  0  0  0  0  0  0  0  0
   -0.5173   -0.6209    0.0000 C   0  0  0  0  0  0  0  0  0  0  0  0
    0.2002   -0.2070    0.0000 C   0  0  0  0  0  0  0  0  0  0  0  0
    0.2002    0.6209    0.0000 C   0  0  0  0  0  0  0  0  0  0  0  0
    0.9123   -0.6183    0.0000 C   0  0  0  0  0  0  0  0  0  0  0  0
    0.9147   -1.4475    0.0000 C   0  0  0  0  0  0  0  0  0  0  0  0
    1.6316   -1.8614    0.0000 C   0  0  0  0  0  0  0  0  0  0  0  0
    2.3485   -1.4475    0.0000 C   0  0  0  0  0  0  0  0  0  0  0  0
    2.3485   -0.6197    0.0000 C   0  0  0  0  0  0  0  0  0  0  0  0
    1.6316   -0.2058    0.0000 C   0  0  0  0  0  0  0  0  0  0  0  0
   -0.5173   -1.4459    0.0000 C   0  0  0  0  0  0  0  0  0  0  0  0
    0.1972   -1.8584    0.0000 O   0  0  0  0  0  0  0  0  0  0  0  0
   -1.2318   -1.8584    0.0000 O   0  0  0  0  0  0  0  0  0  0  0  0
   -1.2318   -2.6834    0.0000 C   0  0  0  0  0  0  0  0  0  0  0  0
   -0.5173   -3.0959    0.0000 C   0  0  0  0  0  0  0  0  0  0  0  0
   -1.9462   -3.0959    0.0000 C   0  0  0  0  0  0  0  0  0  0  0  0
    1.0220    0.6933    0.0000 C   0  0  0  0  0  0  0  0  0  0  0  0
    1.3772    0.1866    0.0000 O   0  0  0  0  0  0  0  0  0  0  0  0
    1.3702    1.4412    0.0000 O   0  0  0  0  0  0  0  0  0  0  0  0
    2.1920    1.5136    0.0000 C   0  0  0  0  0  0  0  0  0  0  0  0
    2.6656    0.8381    0.0000 C   0  0  0  0  0  0  0  0  0  0  0  0
    2.5402    2.2615    0.0000 C   0  0  0  0  0  0  0  0  0  0  0  0
    0.2002    1.4459    0.0000 C   0  0  0  0  0  0  0  0  0  0  0  0
   -0.5143    1.8584    0.0000 O   0  0  0  0  0  0  0  0  0  0  0  0
    0.9146    1.8584    0.0000 O   0  0  0  0  0  0  0  0  0  0  0  0
    0.9146    2.6834    0.0000 C   0  0  0  0  0  0  0  0  0  0  0  0
    0.2002    3.0959    0.0000 C   0  0  0  0  0  0  0  0  0  0  0  0
    1.6291    3.0959    0.0000 C   0  0  0  0  0  0  0  0  0  0  0  0
  1  2  2  0      
  2  3  1  0      
  3  4  2  0      
  4  5  1  0      
  5  6  2  0      
  6  1  1  0      
  4  7  1  0      
  7  8  1  0      
  8  9  1  0      
  5  9  1  0      
  7 16  1  1      
  8 10  1  6      
  9 22  1  0      
  9 28  1  0      
 10 11  2  0      
 11 12  1  0      
 12 13  2  0      
 13 14  1  0      
 14 15  2  0      
 15 10  1  0      
 16 17  2  0      
 16 18  1  0      
 18 19  1  0      
 19 20  1  0      
 19 21  1  0      
 22 23  2  0      
 22 24  1  0      
 24 25  1  0      
 25 26  1  0      
 25 27  1  0      
 28 29  2  0      
 28 30  1  0      
 30 31  1  0      
 31 32  1  0      
 31 33  1  0      
M  END
