# Supplementary material for: Catalytic enantioselective synthesis of indanes by a cation-directed 5-endo-trig cyclization
Source: Springer Nature journal article supplement (doi:10.1038/nchem.2150), 2015-01-12
Supplement: 41557_2015_BFnchem2150_MOESM41_ESM.cif [file 41557_2015_BFnchem2150_MOESM41_ESM.cif]

############################################################# 
# ***oxford university chemical crystallography group*** 
# 
# this structure was solved by Russell W Driver on 21/05/2013 
############################################################# 

data_global 
_audit_creation_date        "13-05-17"
_audit_creation_method CRYSTALS_ver_14.23

_oxford_structure_analysis_title  '033RWD13'
_chemical_name_systematic         .
_chemical_melting_point           .

_cell_length_a                    12.27450(10)
_cell_length_b                    17.2889(2)
_cell_length_c                    14.5037(2)
_cell_angle_alpha                 90
_cell_angle_beta                  100.2480(5)
_cell_angle_gamma                 90
_cell_volume                      3028.77(6)
 
_symmetry_cell_setting            'Monoclinic' 
_symmetry_space_group_name_H-M    'P 1 21 1 ' 
_symmetry_space_group_name_Hall   'P 2yb'
loop_
 _symmetry_equiv_pos_as_xyz
 'x,y,z'
 '-x,y+1/2,-z'

loop_
_atom_type_symbol
_atom_type_scat_dispersion_real
_atom_type_scat_dispersion_imag
_atom_type_scat_Cromer_Mann_a1
_atom_type_scat_Cromer_Mann_b1
_atom_type_scat_Cromer_Mann_a2
_atom_type_scat_Cromer_Mann_b2
_atom_type_scat_Cromer_Mann_a3
_atom_type_scat_Cromer_Mann_b3
_atom_type_scat_Cromer_Mann_a4
_atom_type_scat_Cromer_Mann_b4
_atom_type_scat_Cromer_Mann_c
_atom_type_scat_source  
 C       0.0033   0.0016   2.3100  20.8439   1.0200  10.2075   1.5886   0.5687
   0.8650  51.6512   0.2156 'International Tables Vol C 4.2.6.8 and 6.1.1.4'
 H       0.0000   0.0000   0.4930  10.5109   0.3229  26.1257   0.1402   3.1424
   0.0408  57.7998   0.0030 'International Tables Vol C 4.2.6.8 and 6.1.1.4'
 O       0.0106   0.0060   3.0485  13.2771   2.2868   5.7011   1.5463   0.3239
   0.8670  32.9089   0.2508 'International Tables Vol C 4.2.6.8 and 6.1.1.4'
 
 
_cell_formula_units_Z                    4

# Given Formula = C33 H40 O8 
# Dc =      1.24 Fooo =   1184.00 Mu =      0.88 M =   1129.35
# Found Formula = C32 H40 O8 
# Dc =      1.21 FOOO =   1184.00 Mu =      0.86 M =   1105.33

_chemical_formula_sum             'C32 H40 O8'
_chemical_formula_moiety          'C32 H40 O8'
_chemical_compound_source                'syn'
_chemical_formula_weight            552.66
 
 
_cell_measurement_reflns_used         7101
_cell_measurement_theta_min              1
_cell_measurement_theta_max              1
_cell_measurement_temperature          150
 
_exptl_crystal_description        'block' 
_exptl_crystal_colour             'clear_pale_colourless' 
_exptl_crystal_size_min           0.300 
_exptl_crystal_size_mid           0.420 
_exptl_crystal_size_max           0.520 
 
_exptl_crystal_density_diffrn     1.212 
_exptl_crystal_density_meas       'not measured' 
_exptl_crystal_density_method     'not measured' 
# Non-dispersive F(000): 
_exptl_crystal_F_000              1184 
_exptl_absorpt_coefficient_mu     0.086 
 
# Sheldrick geometric approximatio 0.96 0.97 
_exptl_absorpt_correction_type    multi-scan 
_exptl_absorpt_process_details    'DENZO/SCALEPACK (Otwinowski & Minor, 1997)' 
_exptl_absorpt_correction_T_min   0.96 
_exptl_absorpt_correction_T_max   0.97 
# For a Kappa CCD, set Tmin to 1.0 and 
# Tmax to the ratio of max:min frame scales in scale_all.log 
_diffrn_measurement_device_type   'Nonius KappaCCD' 
_diffrn_measurement_device        'Area' 
_diffrn_radiation_monochromator   'graphite' 
_diffrn_radiation_type            'Mo K\a'
_diffrn_radiation_wavelength           0.71073
_diffrn_measurement_method        \w 
 
# If a reference occurs more than once, delete the author 
# and date from subsequent references. 
_computing_data_collection        'COLLECT (Nonius, 2001).' 
_computing_cell_refinement        'DENZO/SCALEPACK (Otwinowski & Minor, 1997)' 
_computing_data_reduction         'DENZO/SCALEPACK (Otwinowski & Minor, 1997)' 
_computing_structure_solution     'SIR92 (Altomare et al., 1994)' 
_computing_structure_refinement   'CRYSTALS (Betteridge et al., 2003)' 
_computing_publication_material   'CRYSTALS (Betteridge et al., 2003)' 
_computing_molecular_graphics     'CAMERON (Watkin et al., 1996)' 
 
_diffrn_standards_interval_time   . 
_diffrn_standards_interval_count  . 
_diffrn_standards_number          0 
_diffrn_standards_decay_%         'not measured' 
 
_diffrn_ambient_temperature        150
_diffrn_reflns_number             13635 
_reflns_number_total              13635 
_diffrn_reflns_av_R_equivalents   0.000 
# Number of reflections without Friedels Law is 13635 
# Number of reflections with Friedels Law is 7115 
# Theoretical number of reflections is about 6967 
 
 
_diffrn_reflns_theta_min          5.127 
_diffrn_reflns_theta_max          27.512 
_diffrn_measured_fraction_theta_max 0.990 
 
_diffrn_reflns_theta_full         26.962 
_diffrn_measured_fraction_theta_full 0.991 
 
 
_diffrn_reflns_limit_h_min        -15 
_diffrn_reflns_limit_h_max        15 
_diffrn_reflns_limit_k_min        -22 
_diffrn_reflns_limit_k_max        22 
_diffrn_reflns_limit_l_min        -18 
_diffrn_reflns_limit_l_max        18 
_reflns_limit_h_min               -15 
_reflns_limit_h_max               15 
_reflns_limit_k_min               -22 
_reflns_limit_k_max               22 
_reflns_limit_l_min               0 
_reflns_limit_l_max               18 
 
_oxford_diffrn_Wilson_B_factor    2.52 
_oxford_diffrn_Wilson_scale       2.60 
 
_atom_sites_solution_primary      Direct #heavy,direct,difmap,geom
# _atom_sites_solution_secondary  difmap
_atom_sites_solution_hydrogens    difmap
 
_refine_diff_density_min          -0.29 
_refine_diff_density_max          0.31 
 
 
# The current dictionary definitions do not cover the 
# situation where the reflections used for refinement were 
# selected by a user-defined sigma threshold 
 
 
# The values actually used during refinement 
_oxford_reflns_threshold_expression_ref     I>-3.0\s(I)
_refine_ls_number_reflns          13635 
_refine_ls_number_restraints      1 
_refine_ls_number_parameters      721 
_oxford_refine_ls_R_factor_ref    0.0481 
_refine_ls_wR_factor_ref          0.0987 
_refine_ls_goodness_of_fit_ref    0.9120 
_refine_ls_shift/su_max           0.0002356 
_refine_ls_shift/su_mean          0.0000225 
 
 
# The values computed from all data 
_oxford_reflns_number_all         13635 
_refine_ls_R_factor_all           0.0481 
_refine_ls_wR_factor_all          0.0987 
 
# The values computed with a 2 sigma cutoff - a la SHELX 
_reflns_threshold_expression      I>2.0\s(I)
_reflns_number_gt                 11945 
_refine_ls_R_factor_gt            0.0399 
_refine_ls_wR_factor_gt           0.0908 
 
# choose from: rm (reference molecule of known chirality), 
# ad (anomolous dispersion - Flack), rmad (rm and ad), 
# syn (from synthesis), unk (unknown) or . (not applicable). 
_chemical_absolute_configuration  '.' 
 
 
_refine_ls_structure_factor_coef  Fsqd 
_refine_ls_matrix_type            full
_refine_ls_hydrogen_treatment     constr         # none, undef, noref, refall,
                                                 # refxyz, refU, constr or mixed
_refine_ls_weighting_scheme       calc 
_refine_ls_weighting_details 
;
 Method, part 1, Chebychev polynomial, (Watkin, 1994, Prince, 1982) 
 [weight] = 1.0/[A~0~*T~0~(x)+A~1~*T~1~(x) ... +A~n-1~]*T~n-1~(x)] 
 where A~i~ are the Chebychev coefficients listed below and x= Fcalc/Fmax 
 Method = Robust Weighting (Prince, 1982) 
 W = [weight] * [1-(deltaF/6*sigmaF)^2^]^2^ 
 A~i~ are: 
 46.4 76.0 46.2 19.6 4.64 
;
# Insert your own references if required - in alphabetical order 
_publ_section_references 
; 
Nonius (2001). COLLECT. Nonius BV, Delft, The Netherlands. 
 
Otwinowski, Z. & Minor, W. (1997). Methods in Enzymology, Vol. 276, 
edited by C. W. Carter Jr & R. M. Sweet, pp. 307--326. 
New York: Academic Press. 
 
Betteridge, P.W., Carruthers, J.R., Cooper, R.I., 
Prout, K. & Watkin, D.J. (2003). J. Appl. Cryst. 36, 1487. 
 
Watkin, D.J., Prout, C.K. & Pearce, L.J. (1996). CAMERON, Chemical 
Crystallography Laboratory, Oxford, UK. 
 
Altomare, A., Cascarano, G., Giacovazzo, C., Guagliardi, A., Burla, M.C., 
Polidori, G. & Camalli, M. (1994). J. Appl. Cryst. 27, 435. 
 
Watkin D.J. (1994). 
Acta Cryst, A50, 411-437. 
 
Prince, E. 
Mathematical Techniques in Crystallography 
and Materials Science 
Springer-Verlag, New York, 1982. 
; 

# Uequiv = arithmetic mean of Ui i.e. Ueqiv = (U1+U2+U3)/3

# Replace last . with number of unfound hydrogen atoms attached to an atom.

# ..._refinement_flags_... 
# . no refinement constraints           S special position constraint on site
# G rigid group refinement of site      R riding atom
# D distance or angle restraint on site T thermal displacement constraints
# U Uiso or Uij restraint (rigid bond)  P partial occupancy constraint


loop_
_atom_site_label
_atom_site_type_symbol
_atom_site_fract_x
_atom_site_fract_y
_atom_site_fract_z
_atom_site_U_iso_or_equiv
_atom_site_occupancy
_atom_site_adp_type
_atom_site_refinement_flags_posn
_atom_site_refinement_flags_adp
_atom_site_refinement_flags_occupancy
_atom_site_disorder_assembly
_atom_site_disorder_group
_atom_site_attached_hydrogens
O1 O 0.07564(10) 0.40861(8) -0.14873(9) 0.0279 1.0000 Uani . . . . . . 
C2 C 0.11643(14) 0.41080(11) -0.05685(12) 0.0245 1.0000 Uani . . . . . . 
O3 O 0.06686(10) 0.39162(8) 0.00369(8) 0.0317 1.0000 Uani . . . . . . 
C4 C 0.23624(14) 0.44169(10) -0.04078(12) 0.0226 1.0000 Uani . . . . . . 
C5 C 0.29131(14) 0.44353(10) 0.06496(12) 0.0232 1.0000 Uani . . . . . . 
C6 C 0.41588(14) 0.43065(11) 0.07940(12) 0.0256 1.0000 Uani . . . . . . 
C7 C 0.48369(16) 0.47172(12) 0.02893(14) 0.0303 1.0000 Uani . . . . . . 
C8 C 0.59768(15) 0.45895(12) 0.04268(14) 0.0318 1.0000 Uani . . . . . . 
C9 C 0.64486(14) 0.40493(12) 0.10802(14) 0.0311 1.0000 Uani . . . . . . 
O10 O 0.75576(11) 0.38663(10) 0.12566(11) 0.0399 1.0000 Uani . . . . . . 
C11 C 0.82275(18) 0.41969(17) 0.06537(19) 0.0526 1.0000 Uani . . . . . . 
C12 C 0.57958(16) 0.36497(13) 0.16084(14) 0.0333 1.0000 Uani . . . . . . 
C13 C 0.46601(15) 0.37757(12) 0.14587(13) 0.0292 1.0000 Uani . . . . . . 
C14 C 0.26204(14) 0.52678(11) 0.09894(12) 0.0234 1.0000 Uani . . . . . . 
C15 C 0.35303(14) 0.55382(11) 0.17805(12) 0.0251 1.0000 Uani . . . . . . 
O16 O 0.35208(11) 0.51085(8) 0.25478(9) 0.0287 1.0000 Uani . . . . . . 
C17 C 0.43916(17) 0.52391(14) 0.33648(14) 0.0372 1.0000 Uani . . . . . . 
C18 C 0.4432(2) 0.45089(15) 0.39346(16) 0.0489 1.0000 Uani . . . . . . 
C19 C 0.4107(3) 0.59408(16) 0.38991(17) 0.0551 1.0000 Uani . . . . . . 
O20 O 0.41664(11) 0.60674(9) 0.17416(10) 0.0344 1.0000 Uani . . . . . . 
C21 C 0.25269(14) 0.57401(11) 0.00948(12) 0.0247 1.0000 Uani . . . . . . 
C22 C 0.23667(14) 0.52614(10) -0.06963(12) 0.0231 1.0000 Uani . . . . . . 
C23 C 0.22215(15) 0.55709(12) -0.15921(13) 0.0279 1.0000 Uani . . . . . . 
C24 C 0.22629(16) 0.63716(13) -0.16975(14) 0.0328 1.0000 Uani . . . . . . 
C25 C 0.24301(17) 0.68495(12) -0.09208(15) 0.0339 1.0000 Uani . . . . . . 
C26 C 0.25582(15) 0.65413(11) -0.00179(14) 0.0298 1.0000 Uani . . . . . . 
C27 C 0.15183(15) 0.52551(11) 0.13683(13) 0.0257 1.0000 Uani . . . . . . 
C28 C 0.12249(18) 0.60263(13) 0.17651(17) 0.0391 1.0000 Uani . . . . . . 
C29 C 0.02289(18) 0.59427(14) 0.22214(17) 0.0448 1.0000 Uani . . . . . . 
O30 O -0.06620(15) 0.57810(14) 0.17477(16) 0.0779 1.0000 Uani . . . . . . 
C31 C 0.0358(2) 0.6081(2) 0.32470(19) 0.0774 1.0000 Uani . . . . . . 
C32 C 0.29818(14) 0.38601(11) -0.09606(12) 0.0251 1.0000 Uani . . . . . . 
O33 O 0.28981(11) 0.31479(8) -0.06133(9) 0.0287 1.0000 Uani . . . . . . 
C34 C 0.34897(18) 0.25159(12) -0.09862(14) 0.0340 1.0000 Uani . . . . . . 
C35 C 0.2836(2) 0.17945(13) -0.08849(17) 0.0453 1.0000 Uani . . . . . . 
C36 C 0.46586(19) 0.24783(15) -0.04385(18) 0.0477 1.0000 Uani . . . . . . 
O37 O 0.34511(12) 0.40201(8) -0.15931(9) 0.0336 1.0000 Uani . . . . . . 
C38 C -0.03575(15) 0.37576(11) -0.17624(13) 0.0304 1.0000 Uani . . . . . . 
C39 C -0.07655(17) 0.40150(12) -0.27551(14) 0.0378 1.0000 Uani . . . . . . 
C40 C -0.02656(19) 0.28892(12) -0.16927(16) 0.0474 1.0000 Uani . . . . . . 
O41 O 0.08392(11) 0.09280(8) 0.33252(9) 0.0309 1.0000 Uani . . . . . . 
C42 C 0.15222(14) 0.14010(11) 0.32173(13) 0.0245 1.0000 Uani . . . . . . 
O43 O 0.15760(10) 0.17648(8) 0.24134(9) 0.0284 1.0000 Uani . . . . . . 
C44 C 0.06908(17) 0.15945(15) 0.16170(14) 0.0384 1.0000 Uani . . . . . . 
C45 C 0.0588(2) 0.23061(17) 0.10097(17) 0.0546 1.0000 Uani . . . . . . 
C46 C 0.0983(3) 0.08800(17) 0.11250(18) 0.0623 1.0000 Uani . . . . . . 
C47 C 0.24537(14) 0.16979(11) 0.39879(12) 0.0228 1.0000 Uani . . . . . . 
C48 C 0.35176(14) 0.16983(11) 0.35624(12) 0.0249 1.0000 Uani . . . . . . 
O49 O 0.36962(11) 0.09840(8) 0.32675(10) 0.0315 1.0000 Uani . . . . . . 
C50 C 0.46602(16) 0.08699(13) 0.28057(15) 0.0363 1.0000 Uani . . . . . . 
C51 C 0.4449(2) 0.12107(17) 0.18404(17) 0.0580 1.0000 Uani . . . . . . 
C52 C 0.4818(2) 0.00039(14) 0.2811(2) 0.0624 1.0000 Uani . . . . . . 
O53 O 0.40980(10) 0.22456(8) 0.34997(9) 0.0351 1.0000 Uani . . . . . . 
C54 C 0.21727(13) 0.25271(10) 0.43214(12) 0.0215 1.0000 Uani . . . . . . 
C55 C 0.27003(14) 0.25421(11) 0.53946(12) 0.0224 1.0000 Uani . . . . . . 
C56 C 0.39274(14) 0.28133(11) 0.55546(12) 0.0247 1.0000 Uani . . . . . . 
C57 C 0.44524(14) 0.28612(12) 0.65850(12) 0.0278 1.0000 Uani . . . . . . 
C58 C 0.56593(15) 0.30813(12) 0.67597(14) 0.0331 1.0000 Uani . . . . . . 
O59 O 0.61461(12) 0.32570(11) 0.61329(11) 0.0542 1.0000 Uani . . . . . . 
C60 C 0.62349(19) 0.30699(15) 0.77686(15) 0.0488 1.0000 Uani . . . . . . 
C61 C 0.20601(14) 0.31056(11) 0.59132(12) 0.0245 1.0000 Uani . . . . . . 
O62 O 0.15986(11) 0.29466(9) 0.65558(9) 0.0347 1.0000 Uani . . . . . . 
O63 O 0.21184(11) 0.38214(8) 0.55598(9) 0.0282 1.0000 Uani . . . . . . 
C64 C 0.14745(17) 0.44396(11) 0.59061(14) 0.0303 1.0000 Uani . . . . . . 
C65 C 0.03514(17) 0.44801(14) 0.52847(14) 0.0391 1.0000 Uani . . . . . . 
C66 C 0.2135(2) 0.51717(13) 0.58761(18) 0.0451 1.0000 Uani . . . . . . 
C67 C 0.26397(14) 0.16961(11) 0.56697(13) 0.0243 1.0000 Uani . . . . . . 
C68 C 0.25725(14) 0.12196(11) 0.48813(13) 0.0240 1.0000 Uani . . . . . . 
C69 C 0.25698(15) 0.04203(12) 0.49659(14) 0.0308 1.0000 Uani . . . . . . 
C70 C 0.26066(16) 0.00943(12) 0.58482(15) 0.0338 1.0000 Uani . . . . . . 
C71 C 0.26500(16) 0.05625(13) 0.66303(15) 0.0336 1.0000 Uani . . . . . . 
C72 C 0.26757(15) 0.13678(12) 0.65510(14) 0.0295 1.0000 Uani . . . . . . 
C73 C 0.09237(14) 0.26604(10) 0.41448(12) 0.0237 1.0000 Uani . . . . . . 
C74 C 0.02304(15) 0.22779(12) 0.46479(13) 0.0285 1.0000 Uani . . . . . . 
C75 C -0.09096(15) 0.23889(12) 0.44692(14) 0.0309 1.0000 Uani . . . . . . 
C76 C -0.13756(14) 0.28947(12) 0.37592(13) 0.0299 1.0000 Uani . . . . . . 
O77 O -0.24870(10) 0.30418(10) 0.35251(10) 0.0422 1.0000 Uani . . . . . . 
C78 C -0.31948(17) 0.26902(16) 0.40835(19) 0.0521 1.0000 Uani . . . . . . 
C79 C -0.06959(16) 0.32785(13) 0.32390(14) 0.0337 1.0000 Uani . . . . . . 
C80 C 0.04364(15) 0.31626(12) 0.34300(12) 0.0277 1.0000 Uani . . . . . . 
H51 H 0.2572 0.4038 0.0988 0.0259 1.0000 Uiso R . . . . . 
H71 H 0.4524 0.5081 -0.0167 0.0358 1.0000 Uiso R . . . . . 
H81 H 0.6432 0.4870 0.0061 0.0379 1.0000 Uiso R . . . . . 
H111 H 0.8968 0.3983 0.0849 0.0781 1.0000 Uiso R . . . . . 
H112 H 0.8238 0.4765 0.0692 0.0779 1.0000 Uiso R . . . . . 
H113 H 0.7966 0.4041 0.0013 0.0789 1.0000 Uiso R . . . . . 
H121 H 0.6139 0.3268 0.2051 0.0404 1.0000 Uiso R . . . . . 
H131 H 0.4220 0.3473 0.1808 0.0356 1.0000 Uiso R . . . . . 
H171 H 0.5108 0.5310 0.3154 0.0443 1.0000 Uiso R . . . . . 
H181 H 0.5025 0.4551 0.4468 0.0726 1.0000 Uiso R . . . . . 
H182 H 0.3724 0.4465 0.4137 0.0723 1.0000 Uiso R . . . . . 
H183 H 0.4554 0.4065 0.3552 0.0734 1.0000 Uiso R . . . . . 
H193 H 0.4685 0.6021 0.4436 0.0822 1.0000 Uiso R . . . . . 
H192 H 0.4053 0.6401 0.3501 0.0826 1.0000 Uiso R . . . . . 
H191 H 0.3404 0.5859 0.4102 0.0817 1.0000 Uiso R . . . . . 
H231 H 0.2100 0.5234 -0.2130 0.0323 1.0000 Uiso R . . . . . 
H241 H 0.2153 0.6583 -0.2317 0.0395 1.0000 Uiso R . . . . . 
H251 H 0.2473 0.7398 -0.0994 0.0419 1.0000 Uiso R . . . . . 
H261 H 0.2694 0.6877 0.0527 0.0353 1.0000 Uiso R . . . . . 
H271 H 0.0908 0.5114 0.0853 0.0304 1.0000 Uiso R . . . . . 
H272 H 0.1546 0.4860 0.1841 0.0312 1.0000 Uiso R . . . . . 
H281 H 0.1845 0.6216 0.2229 0.0467 1.0000 Uiso R . . . . . 
H282 H 0.1014 0.6401 0.1232 0.0485 1.0000 Uiso R . . . . . 
H311 H -0.0291 0.5932 0.3479 0.1157 1.0000 Uiso R . . . . . 
H312 H 0.0559 0.6622 0.3379 0.1161 1.0000 Uiso R . . . . . 
H313 H 0.0969 0.5777 0.3544 0.1169 1.0000 Uiso R . . . . . 
H341 H 0.3498 0.2623 -0.1645 0.0393 1.0000 Uiso R . . . . . 
H353 H 0.3214 0.1351 -0.1125 0.0672 1.0000 Uiso R . . . . . 
H352 H 0.2091 0.1847 -0.1246 0.0668 1.0000 Uiso R . . . . . 
H351 H 0.2814 0.1701 -0.0230 0.0669 1.0000 Uiso R . . . . . 
H363 H 0.5047 0.2060 -0.0668 0.0715 1.0000 Uiso R . . . . . 
H362 H 0.5038 0.2968 -0.0519 0.0716 1.0000 Uiso R . . . . . 
H361 H 0.4653 0.2393 0.0242 0.0715 1.0000 Uiso R . . . . . 
H381 H -0.0835 0.3981 -0.1344 0.0367 1.0000 Uiso R . . . . . 
H391 H -0.1525 0.3855 -0.2942 0.0568 1.0000 Uiso R . . . . . 
H392 H -0.0683 0.4570 -0.2834 0.0565 1.0000 Uiso R . . . . . 
H393 H -0.0335 0.3749 -0.3159 0.0566 1.0000 Uiso R . . . . . 
H403 H -0.0984 0.2664 -0.1888 0.0703 1.0000 Uiso R . . . . . 
H402 H 0.0219 0.2692 -0.2121 0.0715 1.0000 Uiso R . . . . . 
H401 H 0.0011 0.2729 -0.1053 0.0713 1.0000 Uiso R . . . . . 
H441 H 0.0027 0.1498 0.1877 0.0457 1.0000 Uiso R . . . . . 
H453 H 0.0004 0.2229 0.0468 0.0812 1.0000 Uiso R . . . . . 
H452 H 0.0384 0.2747 0.1353 0.0822 1.0000 Uiso R . . . . . 
H451 H 0.1281 0.2403 0.0791 0.0807 1.0000 Uiso R . . . . . 
H461 H 0.0384 0.0759 0.0620 0.0931 1.0000 Uiso R . . . . . 
H462 H 0.1645 0.0975 0.0860 0.0917 1.0000 Uiso R . . . . . 
H463 H 0.1104 0.0448 0.1545 0.0923 1.0000 Uiso R . . . . . 
H501 H 0.5297 0.1110 0.3203 0.0427 1.0000 Uiso R . . . . . 
H511 H 0.5104 0.1119 0.1566 0.0861 1.0000 Uiso R . . . . . 
H512 H 0.4279 0.1768 0.1856 0.0863 1.0000 Uiso R . . . . . 
H513 H 0.3834 0.0925 0.1471 0.0871 1.0000 Uiso R . . . . . 
H523 H 0.5444 -0.0122 0.2519 0.0936 1.0000 Uiso R . . . . . 
H522 H 0.4952 -0.0193 0.3459 0.0936 1.0000 Uiso R . . . . . 
H521 H 0.4148 -0.0233 0.2454 0.0925 1.0000 Uiso R . . . . . 
H541 H 0.2527 0.2929 0.3949 0.0252 1.0000 Uiso R . . . . . 
H561 H 0.3972 0.3316 0.5282 0.0288 1.0000 Uiso R . . . . . 
H562 H 0.4366 0.2450 0.5240 0.0297 1.0000 Uiso R . . . . . 
H571 H 0.4054 0.3239 0.6909 0.0339 1.0000 Uiso R . . . . . 
H572 H 0.4407 0.2358 0.6879 0.0341 1.0000 Uiso R . . . . . 
H641 H 0.1391 0.4314 0.6558 0.0347 1.0000 Uiso R . . . . . 
H652 H -0.0084 0.4899 0.5502 0.0589 1.0000 Uiso R . . . . . 
H651 H 0.0448 0.4600 0.4646 0.0585 1.0000 Uiso R . . . . . 
H653 H -0.0043 0.3984 0.5281 0.0565 1.0000 Uiso R . . . . . 
H661 H 0.1733 0.5611 0.6067 0.0664 1.0000 Uiso R . . . . . 
H662 H 0.2856 0.5129 0.6284 0.0654 1.0000 Uiso R . . . . . 
H663 H 0.2240 0.5257 0.5237 0.0673 1.0000 Uiso R . . . . . 
H691 H 0.2531 0.0100 0.4436 0.0365 1.0000 Uiso R . . . . . 
H701 H 0.2599 -0.0463 0.5925 0.0408 1.0000 Uiso R . . . . . 
H711 H 0.2674 0.0345 0.7226 0.0409 1.0000 Uiso R . . . . . 
H721 H 0.2695 0.1690 0.7074 0.0346 1.0000 Uiso R . . . . . 
H741 H 0.0511 0.1926 0.5120 0.0342 1.0000 Uiso R . . . . . 
H751 H -0.1357 0.2124 0.4839 0.0369 1.0000 Uiso R . . . . . 
H783 H -0.3944 0.2837 0.3817 0.0765 1.0000 Uiso R . . . . . 
H782 H -0.3000 0.2860 0.4739 0.0768 1.0000 Uiso R . . . . . 
H781 H -0.3145 0.2135 0.4053 0.0768 1.0000 Uiso R . . . . . 
H791 H -0.1018 0.3599 0.2720 0.0397 1.0000 Uiso R . . . . . 
H801 H 0.0890 0.3434 0.3048 0.0326 1.0000 Uiso R . . . . . 
H602 H 0.6972 0.3264 0.7805 0.0727 1.0000 Uiso R . . . . . 
H603 H 0.5829 0.3392 0.8160 0.0724 1.0000 Uiso R . . . . . 
H601 H 0.6250 0.2550 0.7993 0.0727 1.0000 Uiso R . . . . . 
loop_
_atom_site_aniso_label
_atom_site_aniso_U_11
_atom_site_aniso_U_22
_atom_site_aniso_U_33
_atom_site_aniso_U_23
_atom_site_aniso_U_13
_atom_site_aniso_U_12
O1 0.0270(6) 0.0276(7) 0.0292(6) 0.0009(5) 0.0054(5) -0.0051(5) 
C2 0.0268(8) 0.0195(8) 0.0280(8) -0.0014(7) 0.0068(7) 0.0012(7) 
O3 0.0323(6) 0.0349(7) 0.0305(6) -0.0016(5) 0.0123(5) -0.0081(5) 
C4 0.0227(8) 0.0216(9) 0.0241(8) 0.0013(7) 0.0061(6) -0.0006(7) 
C5 0.0243(8) 0.0222(9) 0.0237(8) 0.0009(7) 0.0062(6) 0.0000(7) 
C6 0.0257(8) 0.0264(9) 0.0250(8) 0.0008(7) 0.0053(7) 0.0043(7) 
C7 0.0277(9) 0.0294(10) 0.0348(10) 0.0091(8) 0.0080(7) 0.0022(7) 
C8 0.0261(9) 0.0333(10) 0.0375(10) 0.0025(8) 0.0093(7) -0.0010(8) 
C9 0.0225(8) 0.0352(10) 0.0358(9) -0.0031(8) 0.0057(7) 0.0039(7) 
O10 0.0224(6) 0.0481(9) 0.0496(8) 0.0071(7) 0.0073(6) 0.0080(6) 
C11 0.0277(10) 0.0680(16) 0.0655(15) 0.0060(12) 0.0180(10) 0.0022(10) 
C12 0.0291(9) 0.0368(10) 0.0335(9) 0.0068(8) 0.0042(7) 0.0104(8) 
C13 0.0291(9) 0.0324(10) 0.0285(9) 0.0033(8) 0.0112(7) 0.0019(7) 
C14 0.0239(8) 0.0200(8) 0.0270(9) 0.0009(7) 0.0064(7) 0.0004(7) 
C15 0.0250(8) 0.0249(9) 0.0260(9) 0.0017(7) 0.0062(7) 0.0007(7) 
O16 0.0285(6) 0.0315(7) 0.0249(6) 0.0034(5) 0.0014(5) -0.0039(5) 
C17 0.0298(10) 0.0514(13) 0.0277(10) 0.0061(9) -0.0023(8) -0.0087(9) 
C18 0.0530(13) 0.0533(14) 0.0360(11) 0.0152(10) -0.0038(10) 0.0018(11) 
C19 0.0783(17) 0.0484(14) 0.0341(11) -0.0022(10) -0.0020(11) -0.0206(12) 
O20 0.0332(7) 0.0361(8) 0.0330(7) 0.0051(6) 0.0033(5) -0.0085(6) 
C21 0.0221(8) 0.0257(9) 0.0259(8) 0.0019(7) 0.0034(6) 0.0012(7) 
C22 0.0201(8) 0.0211(9) 0.0282(9) 0.0004(7) 0.0042(6) -0.0021(7) 
C23 0.0278(9) 0.0290(10) 0.0269(9) 0.0035(7) 0.0053(7) -0.0022(7) 
C24 0.0336(10) 0.0319(10) 0.0320(10) 0.0092(8) 0.0036(8) -0.0016(8) 
C25 0.0335(10) 0.0236(10) 0.0432(11) 0.0088(8) 0.0033(8) -0.0033(8) 
C26 0.0298(9) 0.0198(9) 0.0383(10) 0.0003(7) 0.0022(7) -0.0018(7) 
C27 0.0261(8) 0.0239(9) 0.0281(9) -0.0014(7) 0.0072(7) 0.0031(7) 
C28 0.0410(11) 0.0313(11) 0.0472(12) -0.0105(9) 0.0140(9) 0.0030(8) 
C29 0.0360(11) 0.0441(13) 0.0559(13) -0.0097(10) 0.0130(10) 0.0088(9) 
O30 0.0410(9) 0.1083(17) 0.0855(14) -0.0393(12) 0.0140(9) -0.0016(10) 
C31 0.0548(15) 0.134(3) 0.0469(15) 0.0123(17) 0.0177(12) -0.0077(18) 
C32 0.0261(8) 0.0252(9) 0.0251(8) 0.0000(7) 0.0072(7) -0.0007(7) 
O33 0.0359(7) 0.0233(7) 0.0300(6) -0.0001(5) 0.0140(5) 0.0031(5) 
C34 0.0462(11) 0.0270(10) 0.0315(10) -0.0029(8) 0.0145(8) 0.0076(8) 
C35 0.0656(15) 0.0291(12) 0.0450(12) -0.0033(10) 0.0201(11) 0.0015(11) 
C36 0.0462(13) 0.0429(13) 0.0568(14) -0.0093(11) 0.0165(10) 0.0132(10) 
O37 0.0409(7) 0.0305(7) 0.0340(7) 0.0002(6) 0.0187(6) -0.0012(6) 
C38 0.0277(9) 0.0297(9) 0.0332(9) 0.0034(7) 0.0035(7) -0.0048(7) 
C39 0.0370(10) 0.0362(10) 0.0383(10) 0.0065(8) 0.0017(8) -0.0036(8) 
C40 0.0537(12) 0.0307(10) 0.0505(12) 0.0070(9) -0.0106(9) -0.0122(9) 
O41 0.0316(7) 0.0312(7) 0.0300(7) -0.0008(5) 0.0057(5) -0.0102(6) 
C42 0.0236(8) 0.0237(9) 0.0268(9) -0.0017(7) 0.0061(7) 0.0006(7) 
O43 0.0286(6) 0.0317(7) 0.0246(6) 0.0009(5) 0.0044(5) -0.0046(5) 
C44 0.0320(10) 0.0542(13) 0.0262(9) 0.0059(9) -0.0023(8) -0.0101(9) 
C45 0.0557(14) 0.0663(17) 0.0387(12) 0.0131(12) -0.0002(10) 0.0051(13) 
C46 0.094(2) 0.0541(16) 0.0346(12) -0.0061(11) 0.0001(12) -0.0284(15) 
C47 0.0216(8) 0.0222(9) 0.0249(8) -0.0009(7) 0.0051(6) -0.0003(7) 
C48 0.0229(8) 0.0283(9) 0.0240(8) -0.0031(7) 0.0053(6) -0.0006(7) 
O49 0.0298(6) 0.0280(7) 0.0400(7) -0.0049(6) 0.0147(5) 0.0027(5) 
C50 0.0299(9) 0.0403(11) 0.0418(11) -0.0093(9) 0.0150(8) 0.0054(8) 
C51 0.0625(15) 0.0709(17) 0.0466(13) -0.0038(12) 0.0261(11) 0.0133(13) 
C52 0.0619(15) 0.0433(13) 0.090(2) -0.0100(12) 0.0361(14) 0.0151(11) 
O53 0.0303(6) 0.0359(7) 0.0427(7) -0.0099(6) 0.0166(5) -0.0076(5) 
C54 0.0201(8) 0.0216(8) 0.0233(8) 0.0014(7) 0.0054(6) 0.0005(6) 
C55 0.0219(8) 0.0246(9) 0.0216(8) 0.0008(7) 0.0066(6) 0.0014(7) 
C56 0.0221(8) 0.0266(9) 0.0260(8) 0.0006(7) 0.0063(6) -0.0027(7) 
C57 0.0272(8) 0.0308(9) 0.0254(8) -0.0015(7) 0.0045(6) -0.0023(7) 
C58 0.0284(9) 0.0334(10) 0.0368(9) -0.0027(8) 0.0036(7) -0.0052(7) 
O59 0.0352(7) 0.0876(13) 0.0415(8) -0.0049(8) 0.0115(6) -0.0190(8) 
C60 0.0423(11) 0.0581(14) 0.0402(11) 0.0101(10) -0.0083(9) -0.0122(10) 
C61 0.0222(8) 0.0260(9) 0.0254(8) -0.0015(7) 0.0047(6) -0.0007(7) 
O62 0.0408(7) 0.0349(8) 0.0328(7) 0.0020(6) 0.0186(6) 0.0052(6) 
O63 0.0330(7) 0.0231(7) 0.0304(6) -0.0007(5) 0.0111(5) 0.0033(5) 
C64 0.0386(10) 0.0252(10) 0.0292(9) -0.0045(8) 0.0117(8) 0.0032(8) 
C65 0.0399(11) 0.0415(12) 0.0355(10) -0.0028(9) 0.0056(8) 0.0130(9) 
C66 0.0605(15) 0.0265(11) 0.0515(13) -0.0044(10) 0.0184(11) -0.0072(10) 
C67 0.0192(8) 0.0263(9) 0.0283(9) 0.0044(7) 0.0066(6) 0.0013(7) 
C68 0.0187(7) 0.0245(9) 0.0289(9) 0.0031(7) 0.0042(6) 0.0002(6) 
C69 0.0290(9) 0.0282(10) 0.0342(10) -0.0004(8) 0.0026(7) -0.0001(7) 
C70 0.0313(10) 0.0267(10) 0.0423(11) 0.0071(8) 0.0035(8) 0.0005(8) 
C71 0.0294(9) 0.0359(11) 0.0356(10) 0.0123(8) 0.0057(8) 0.0009(8) 
C72 0.0275(9) 0.0324(10) 0.0287(9) 0.0034(8) 0.0054(7) 0.0010(7) 
C73 0.0227(8) 0.0236(9) 0.0254(8) -0.0032(7) 0.0059(6) 0.0002(6) 
C74 0.0246(8) 0.0279(9) 0.0330(9) 0.0038(8) 0.0049(7) 0.0009(7) 
C75 0.0244(8) 0.0340(10) 0.0360(10) -0.0011(8) 0.0097(7) -0.0009(7) 
C76 0.0204(8) 0.0357(10) 0.0323(9) -0.0060(8) 0.0011(6) 0.0034(7) 
O77 0.0196(6) 0.0606(10) 0.0451(8) 0.0012(7) 0.0023(5) 0.0059(6) 
C78 0.0215(9) 0.0693(17) 0.0654(15) 0.0064(12) 0.0074(9) 0.0034(10) 
C79 0.0300(9) 0.0413(11) 0.0287(9) 0.0039(8) 0.0024(7) 0.0049(8) 
C80 0.0274(8) 0.0307(10) 0.0244(8) 0.0023(7) 0.0030(6) 0.0041(7) 

_refine_ls_extinction_method 
    'None'
_oxford_refine_ls_scale 0.6417(8) 
loop_
 _geom_bond_atom_site_label_1
 _geom_bond_site_symmetry_1
 _geom_bond_atom_site_label_2
 _geom_bond_site_symmetry_2
 _geom_bond_distance
 _geom_bond_publ_flag
O1 . C2 . 1.338(2)    yes
O1 . C38 . 1.469(2)    yes
C2 . O3 . 1.201(2)    yes
C2 . C4 . 1.543(2)    yes
C4 . C5 . 1.563(2)    yes
C4 . C22 . 1.519(2)    yes
C4 . C32 . 1.538(2)    yes
C5 . C6 . 1.522(2)    yes
C5 . C14 . 1.583(2)    yes
C5 . H51 . 0.981    no
C6 . C7 . 1.396(3)    yes
C6 . C13 . 1.393(3)    yes
C7 . C8 . 1.395(3)    yes
C7 . H71 . 0.944    no
C8 . C9 . 1.382(3)    yes
C8 . H81 . 0.967    no
C9 . O10 . 1.376(2)    yes
C9 . C12 . 1.387(3)    yes
O10 . C11 . 1.422(3)    yes
C11 . H111 . 0.975    no
C11 . H112 . 0.983    no
C11 . H113 . 0.966    no
C12 . C13 . 1.389(3)    yes
C12 . H121 . 0.964    no
C13 . H131 . 0.959    no
C14 . C15 . 1.525(2)    yes
C14 . C21 . 1.520(2)    yes
C14 . C27 . 1.548(2)    yes
C15 . O16 . 1.340(2)    yes
C15 . O20 . 1.211(2)    yes
O16 . C17 . 1.465(2)    yes
C17 . C18 . 1.505(3)    yes
C17 . C19 . 1.514(4)    yes
C17 . H171 . 0.989    no
C18 . H181 . 0.966    no
C18 . H182 . 0.969    no
C18 . H183 . 0.974    no
C19 . H193 . 0.965    no
C19 . H192 . 0.979    no
C19 . H191 . 0.970    no
C21 . C22 . 1.400(3)    yes
C21 . C26 . 1.396(3)    yes
C22 . C23 . 1.387(2)    yes
C23 . C24 . 1.395(3)    yes
C23 . H231 . 0.965    no
C24 . C25 . 1.383(3)    yes
C24 . H241 . 0.957    no
C25 . C26 . 1.397(3)    yes
C25 . H251 . 0.957    no
C26 . H261 . 0.971    no
C27 . C28 . 1.521(3)    yes
C27 . H271 . 0.990    no
C27 . H272 . 0.964    no
C28 . C29 . 1.497(3)    yes
C28 . H281 . 0.978    no
C28 . H282 . 1.006    no
C29 . O30 . 1.216(3)    yes
C29 . C31 . 1.487(4)    yes
C31 . H311 . 0.953    no
C31 . H312 . 0.977    no
C31 . H313 . 0.953    no
C32 . O33 . 1.341(2)    yes
C32 . O37 . 1.199(2)    yes
O33 . C34 . 1.467(2)    yes
C34 . C35 . 1.504(3)    yes
C34 . C36 . 1.513(3)    yes
C34 . H341 . 0.976    no
C35 . H353 . 0.991    no
C35 . H352 . 0.974    no
C35 . H351 . 0.969    no
C36 . H363 . 0.958    no
C36 . H362 . 0.983    no
C36 . H361 . 0.999    no
C38 . C39 . 1.505(3)    yes
C38 . C40 . 1.508(3)    yes
C38 . H381 . 0.994    no
C39 . H391 . 0.964    no
C39 . H392 . 0.974    no
C39 . H393 . 0.972    no
C40 . H403 . 0.960    no
C40 . H402 . 0.994    no
C40 . H401 . 0.970    no
O41 . C42 . 1.201(2)    yes
C42 . O43 . 1.337(2)    yes
C42 . C47 . 1.538(2)    yes
O43 . C44 . 1.468(2)    yes
C44 . C45 . 1.505(3)    yes
C44 . C46 . 1.501(4)    yes
C44 . H441 . 0.971    no
C45 . H453 . 0.973    no
C45 . H452 . 0.967    no
C45 . H451 . 0.973    no
C46 . H461 . 0.963    no
C46 . H462 . 0.973    no
C46 . H463 . 0.959    no
C47 . C48 . 1.540(2)    yes
C47 . C54 . 1.571(2)    yes
C47 . C68 . 1.522(2)    yes
C48 . O49 . 1.338(2)    yes
C48 . O53 . 1.198(2)    yes
O49 . C50 . 1.473(2)    yes
C50 . C51 . 1.498(3)    yes
C50 . C52 . 1.509(3)    yes
C50 . H501 . 0.977    no
C51 . H511 . 0.971    no
C51 . H512 . 0.986    no
C51 . H513 . 0.978    no
C52 . H523 . 0.966    no
C52 . H522 . 0.986    no
C52 . H521 . 0.980    no
C54 . C55 . 1.576(2)    yes
C54 . C73 . 1.526(2)    yes
C54 . H541 . 1.023    no
C55 . C56 . 1.555(2)    yes
C55 . C61 . 1.531(2)    yes
C55 . C67 . 1.521(3)    yes
C56 . C57 . 1.521(2)    yes
C56 . H561 . 0.960    no
C56 . H562 . 0.989    no
C57 . C58 . 1.507(2)    yes
C57 . H571 . 0.985    no
C57 . H572 . 0.975    no
C58 . O59 . 1.212(2)    yes
C58 . C60 . 1.508(3)    yes
C60 . H602 . 0.958    no
C60 . H603 . 0.990    no
C60 . H601 . 0.956    no
C61 . O62 . 1.205(2)    yes
C61 . O63 . 1.346(2)    yes
O63 . C64 . 1.470(2)    yes
C64 . C65 . 1.508(3)    yes
C64 . C66 . 1.508(3)    yes
C64 . H641 . 0.992    no
C65 . H652 . 0.986    no
C65 . H651 . 0.976    no
C65 . H653 . 0.984    no
C66 . H661 . 0.972    no
C66 . H662 . 0.976    no
C66 . H663 . 0.970    no
C67 . C68 . 1.400(3)    yes
C67 . C72 . 1.392(3)    yes
C68 . C69 . 1.388(3)    yes
C69 . C70 . 1.392(3)    yes
C69 . H691 . 0.942    no
C70 . C71 . 1.387(3)    yes
C70 . H701 . 0.971    no
C71 . C72 . 1.398(3)    yes
C71 . H711 . 0.938    no
C72 . H721 . 0.938    no
C73 . C74 . 1.384(2)    yes
C73 . C80 . 1.402(3)    yes
C74 . C75 . 1.390(3)    yes
C74 . H741 . 0.935    no
C75 . C76 . 1.394(3)    yes
C75 . H751 . 0.951    no
C76 . O77 . 1.370(2)    yes
C76 . C79 . 1.389(3)    yes
O77 . C78 . 1.425(3)    yes
C78 . H783 . 0.966    no
C78 . H782 . 0.983    no
C78 . H781 . 0.964    no
C79 . C80 . 1.383(3)    yes
C79 . H791 . 0.961    no
C80 . H801 . 0.974    no
loop_
 _geom_angle_atom_site_label_1
 _geom_angle_site_symmetry_1
 _geom_angle_atom_site_label_2
 _geom_angle_site_symmetry_2
 _geom_angle_atom_site_label_3
 _geom_angle_site_symmetry_3
 _geom_angle
 _geom_angle_publ_flag
C2 . O1 . C38 . 116.54(13)    yes
O1 . C2 . O3 . 124.90(16)    yes
O1 . C2 . C4 . 109.75(14)    yes
O3 . C2 . C4 . 125.36(16)    yes
C2 . C4 . C5 . 112.93(13)    yes
C2 . C4 . C22 . 109.94(14)    yes
C5 . C4 . C22 . 103.22(14)    yes
C2 . C4 . C32 . 104.54(14)    yes
C5 . C4 . C32 . 110.91(14)    yes
C22 . C4 . C32 . 115.59(14)    yes
C4 . C5 . C6 . 112.37(14)    yes
C4 . C5 . C14 . 103.98(14)    yes
C6 . C5 . C14 . 111.61(15)    yes
C4 . C5 . H51 . 109.1    no
C6 . C5 . H51 . 109.7    no
C14 . C5 . H51 . 109.9    no
C5 . C6 . C7 . 122.09(16)    yes
C5 . C6 . C13 . 120.07(16)    yes
C7 . C6 . C13 . 117.83(16)    yes
C6 . C7 . C8 . 121.38(18)    yes
C6 . C7 . H71 . 120.0    no
C8 . C7 . H71 . 118.6    no
C7 . C8 . C9 . 119.48(18)    yes
C7 . C8 . H81 . 120.3    no
C9 . C8 . H81 . 120.2    no
C8 . C9 . O10 . 124.24(17)    yes
C8 . C9 . C12 . 120.16(17)    yes
O10 . C9 . C12 . 115.60(18)    yes
C9 . O10 . C11 . 117.01(17)    yes
O10 . C11 . H111 . 106.3    no
O10 . C11 . H112 . 111.7    no
H111 . C11 . H112 . 111.1    no
O10 . C11 . H113 . 110.5    no
H111 . C11 . H113 . 107.8    no
H112 . C11 . H113 . 109.4    no
C9 . C12 . C13 . 119.85(18)    yes
C9 . C12 . H121 . 118.8    no
C13 . C12 . H121 . 121.2    no
C6 . C13 . C12 . 121.26(17)    yes
C6 . C13 . H131 . 120.2    no
C12 . C13 . H131 . 118.5    no
C5 . C14 . C15 . 109.66(14)    yes
C5 . C14 . C21 . 102.10(14)    yes
C15 . C14 . C21 . 114.30(15)    yes
C5 . C14 . C27 . 111.01(14)    yes
C15 . C14 . C27 . 107.84(14)    yes
C21 . C14 . C27 . 111.87(15)    yes
C14 . C15 . O16 . 109.97(15)    yes
C14 . C15 . O20 . 126.06(17)    yes
O16 . C15 . O20 . 123.97(17)    yes
C15 . O16 . C17 . 118.25(15)    yes
O16 . C17 . C18 . 105.25(18)    yes
O16 . C17 . C19 . 109.63(18)    yes
C18 . C17 . C19 . 112.30(19)    yes
O16 . C17 . H171 . 109.3    no
C18 . C17 . H171 . 109.2    no
C19 . C17 . H171 . 110.9    no
C17 . C18 . H181 . 108.8    no
C17 . C18 . H182 . 106.8    no
H181 . C18 . H182 . 110.6    no
C17 . C18 . H183 . 110.0    no
H181 . C18 . H183 . 110.3    no
H182 . C18 . H183 . 110.3    no
C17 . C19 . H193 . 108.9    no
C17 . C19 . H192 . 110.3    no
H193 . C19 . H192 . 108.8    no
C17 . C19 . H191 . 109.8    no
H193 . C19 . H191 . 110.0    no
H192 . C19 . H191 . 109.0    no
C14 . C21 . C22 . 111.12(16)    yes
C14 . C21 . C26 . 129.30(17)    yes
C22 . C21 . C26 . 119.56(17)    yes
C4 . C22 . C21 . 110.45(15)    yes
C4 . C22 . C23 . 128.51(17)    yes
C21 . C22 . C23 . 121.04(17)    yes
C22 . C23 . C24 . 118.98(18)    yes
C22 . C23 . H231 . 120.0    no
C24 . C23 . H231 . 121.0    no
C23 . C24 . C25 . 120.45(19)    yes
C23 . C24 . H241 . 118.7    no
C25 . C24 . H241 . 120.8    no
C24 . C25 . C26 . 120.78(19)    yes
C24 . C25 . H251 . 120.3    no
C26 . C25 . H251 . 118.9    no
C25 . C26 . C21 . 119.17(19)    yes
C25 . C26 . H261 . 120.6    no
C21 . C26 . H261 . 120.2    no
C14 . C27 . C28 . 113.74(16)    yes
C14 . C27 . H271 . 109.1    no
C28 . C27 . H271 . 107.7    no
C14 . C27 . H272 . 109.9    no
C28 . C27 . H272 . 109.4    no
H271 . C27 . H272 . 106.8    no
C27 . C28 . C29 . 110.47(18)    yes
C27 . C28 . H281 . 110.3    no
C29 . C28 . H281 . 109.0    no
C27 . C28 . H282 . 108.6    no
C29 . C28 . H282 . 106.4    no
H281 . C28 . H282 . 112.0    no
C28 . C29 . O30 . 119.7(2)    yes
C28 . C29 . C31 . 118.4(2)    yes
O30 . C29 . C31 . 121.8(2)    yes
C29 . C31 . H311 . 111.2    no
C29 . C31 . H312 . 109.2    no
H311 . C31 . H312 . 112.8    no
C29 . C31 . H313 . 107.4    no
H311 . C31 . H313 . 109.3    no
H312 . C31 . H313 . 106.8    no
C4 . C32 . O33 . 107.51(13)    yes
C4 . C32 . O37 . 127.14(17)    yes
O33 . C32 . O37 . 125.34(17)    yes
C32 . O33 . C34 . 117.98(14)    yes
O33 . C34 . C35 . 105.92(16)    yes
O33 . C34 . C36 . 108.89(17)    yes
C35 . C34 . C36 . 112.7(2)    yes
O33 . C34 . H341 . 108.2    no
C35 . C34 . H341 . 110.6    no
C36 . C34 . H341 . 110.4    no
C34 . C35 . H353 . 108.4    no
C34 . C35 . H352 . 109.7    no
H353 . C35 . H352 . 109.6    no
C34 . C35 . H351 . 110.0    no
H353 . C35 . H351 . 108.3    no
H352 . C35 . H351 . 110.8    no
C34 . C36 . H363 . 109.6    no
C34 . C36 . H362 . 109.0    no
H363 . C36 . H362 . 109.5    no
C34 . C36 . H361 . 110.6    no
H363 . C36 . H361 . 108.8    no
H362 . C36 . H361 . 109.4    no
O1 . C38 . C39 . 106.31(14)    yes
O1 . C38 . C40 . 108.17(15)    yes
C39 . C38 . C40 . 111.52(17)    yes
O1 . C38 . H381 . 107.8    no
C39 . C38 . H381 . 109.7    no
C40 . C38 . H381 . 113.0    no
C38 . C39 . H391 . 108.9    no
C38 . C39 . H392 . 112.4    no
H391 . C39 . H392 . 111.4    no
C38 . C39 . H393 . 108.3    no
H391 . C39 . H393 . 107.3    no
H392 . C39 . H393 . 108.4    no
C38 . C40 . H403 . 109.3    no
C38 . C40 . H402 . 110.2    no
H403 . C40 . H402 . 107.3    no
C38 . C40 . H401 . 111.0    no
H403 . C40 . H401 . 108.3    no
H402 . C40 . H401 . 110.7    no
O41 . C42 . O43 . 125.30(17)    yes
O41 . C42 . C47 . 125.35(17)    yes
O43 . C42 . C47 . 109.34(14)    yes
C42 . O43 . C44 . 116.59(14)    yes
O43 . C44 . C45 . 105.65(19)    yes
O43 . C44 . C46 . 109.5(2)    yes
C45 . C44 . C46 . 113.4(2)    yes
O43 . C44 . H441 . 106.4    no
C45 . C44 . H441 . 112.3    no
C46 . C44 . H441 . 109.3    no
C44 . C45 . H453 . 109.5    no
C44 . C45 . H452 . 110.2    no
H453 . C45 . H452 . 107.5    no
C44 . C45 . H451 . 110.1    no
H453 . C45 . H451 . 108.7    no
H452 . C45 . H451 . 110.6    no
C44 . C46 . H461 . 109.0    no
C44 . C46 . H462 . 109.6    no
H461 . C46 . H462 . 108.3    no
C44 . C46 . H463 . 111.3    no
H461 . C46 . H463 . 108.9    no
H462 . C46 . H463 . 109.7    no
C42 . C47 . C48 . 106.42(14)    yes
C42 . C47 . C54 . 110.66(14)    yes
C48 . C47 . C54 . 111.79(14)    yes
C42 . C47 . C68 . 112.55(14)    yes
C48 . C47 . C68 . 112.44(14)    yes
C54 . C47 . C68 . 103.10(13)    yes
C47 . C48 . O49 . 109.06(15)    yes
C47 . C48 . O53 . 126.09(17)    yes
O49 . C48 . O53 . 124.86(16)    yes
C48 . O49 . C50 . 117.36(15)    yes
O49 . C50 . C51 . 110.67(17)    yes
O49 . C50 . C52 . 104.05(17)    yes
C51 . C50 . C52 . 113.3(2)    yes
O49 . C50 . H501 . 107.3    no
C51 . C50 . H501 . 111.8    no
C52 . C50 . H501 . 109.3    no
C50 . C51 . H511 . 107.5    no
C50 . C51 . H512 . 111.3    no
H511 . C51 . H512 . 111.3    no
C50 . C51 . H513 . 107.6    no
H511 . C51 . H513 . 108.0    no
H512 . C51 . H513 . 111.0    no
C50 . C52 . H523 . 109.4    no
C50 . C52 . H522 . 110.4    no
H523 . C52 . H522 . 109.2    no
C50 . C52 . H521 . 108.5    no
H523 . C52 . H521 . 109.3    no
H522 . C52 . H521 . 110.0    no
C47 . C54 . C55 . 104.18(14)    yes
C47 . C54 . C73 . 110.81(14)    yes
C55 . C54 . C73 . 112.78(13)    yes
C47 . C54 . H541 . 108.7    no
C55 . C54 . H541 . 111.8    no
C73 . C54 . H541 . 108.5    no
C54 . C55 . C56 . 111.66(13)    yes
C54 . C55 . C61 . 109.82(14)    yes
C56 . C55 . C61 . 107.64(14)    yes
C54 . C55 . C67 . 102.27(14)    yes
C56 . C55 . C67 . 110.00(14)    yes
C61 . C55 . C67 . 115.45(14)    yes
C55 . C56 . C57 . 113.13(14)    yes
C55 . C56 . H561 . 109.6    no
C57 . C56 . H561 . 108.1    no
C55 . C56 . H562 . 109.4    no
C57 . C56 . H562 . 108.5    no
H561 . C56 . H562 . 108.0    no
C56 . C57 . C58 . 114.27(15)    yes
C56 . C57 . H571 . 110.2    no
C58 . C57 . H571 . 108.0    no
C56 . C57 . H572 . 109.6    no
C58 . C57 . H572 . 106.4    no
H571 . C57 . H572 . 108.2    no
C57 . C58 . O59 . 122.58(17)    yes
C57 . C58 . C60 . 115.90(16)    yes
O59 . C58 . C60 . 121.52(18)    yes
C58 . C60 . H602 . 108.9    no
C58 . C60 . H603 . 110.6    no
H602 . C60 . H603 . 109.8    no
C58 . C60 . H601 . 108.7    no
H602 . C60 . H601 . 110.5    no
H603 . C60 . H601 . 108.4    no
C55 . C61 . O62 . 126.00(17)    yes
C55 . C61 . O63 . 109.35(14)    yes
O62 . C61 . O63 . 124.62(17)    yes
C61 . O63 . C64 . 118.04(13)    yes
O63 . C64 . C65 . 108.63(15)    yes
O63 . C64 . C66 . 106.04(16)    yes
C65 . C64 . C66 . 112.49(19)    yes
O63 . C64 . H641 . 108.6    no
C65 . C64 . H641 . 109.9    no
C66 . C64 . H641 . 111.0    no
C64 . C65 . H652 . 109.5    no
C64 . C65 . H651 . 108.9    no
H652 . C65 . H651 . 108.2    no
C64 . C65 . H653 . 111.1    no
H652 . C65 . H653 . 110.3    no
H651 . C65 . H653 . 108.8    no
C64 . C66 . H661 . 110.2    no
C64 . C66 . H662 . 110.6    no
H661 . C66 . H662 . 109.8    no
C64 . C66 . H663 . 108.6    no
H661 . C66 . H663 . 108.3    no
H662 . C66 . H663 . 109.2    no
C55 . C67 . C68 . 110.49(15)    yes
C55 . C67 . C72 . 129.63(17)    yes
C68 . C67 . C72 . 119.85(18)    yes
C47 . C68 . C67 . 111.01(16)    yes
C47 . C68 . C69 . 127.95(17)    yes
C67 . C68 . C69 . 120.97(17)    yes
C68 . C69 . C70 . 118.98(19)    yes
C68 . C69 . H691 . 121.0    no
C70 . C69 . H691 . 120.0    no
C69 . C70 . C71 . 120.39(19)    yes
C69 . C70 . H701 . 120.6    no
C71 . C70 . H701 . 119.0    no
C70 . C71 . C72 . 120.82(19)    yes
C70 . C71 . H711 . 120.6    no
C72 . C71 . H711 . 118.6    no
C71 . C72 . C67 . 118.96(19)    yes
C71 . C72 . H721 . 121.5    no
C67 . C72 . H721 . 119.5    no
C54 . C73 . C74 . 122.20(16)    yes
C54 . C73 . C80 . 120.08(15)    yes
C74 . C73 . C80 . 117.67(16)    yes
C73 . C74 . C75 . 121.91(18)    yes
C73 . C74 . H741 . 121.1    no
C75 . C74 . H741 . 117.0    no
C74 . C75 . C76 . 119.44(17)    yes
C74 . C75 . H751 . 119.5    no
C76 . C75 . H751 . 121.1    no
C75 . C76 . O77 . 124.01(17)    yes
C75 . C76 . C79 . 119.59(16)    yes
O77 . C76 . C79 . 116.40(18)    yes
C76 . O77 . C78 . 117.45(17)    yes
O77 . C78 . H783 . 107.0    no
O77 . C78 . H782 . 110.7    no
H783 . C78 . H782 . 111.1    no
O77 . C78 . H781 . 110.4    no
H783 . C78 . H781 . 107.9    no
H782 . C78 . H781 . 109.6    no
C76 . C79 . C80 . 120.09(18)    yes
C76 . C79 . H791 . 119.8    no
C80 . C79 . H791 . 120.0    no
C73 . C80 . C79 . 121.29(17)    yes
C73 . C80 . H801 . 120.5    no
C79 . C80 . H801 . 118.2    no
loop_
 _geom_hbond_atom_site_label_D
 _geom_hbond_site_symmetry_D
 _geom_hbond_atom_site_label_H
 _geom_hbond_site_symmetry_H
 _geom_hbond_atom_site_label_A
 _geom_hbond_site_symmetry_A
 _geom_hbond_angle_DHA
 _geom_hbond_distance_DH
 _geom_hbond_distance_HA
 _geom_hbond_distance_DA
 _geom_hbond_publ_flag
C11 . H111 . O3 1_655 132.35(7) 0.975 2.576 3.312(3)    yes
C11 . H112 . O30 1_655 136.14(8) 0.983 2.554 3.333(3)    yes
C12 . H121 . O77 1_655 145.35(6) 0.964 2.507 3.345(3)    yes
C25 . H251 . O10 2_655 175.80(6) 0.957 2.566 3.521(3)    yes
C27 . H271 . O3 . 126.94(5) 0.990 2.377 3.075(3)    yes
C35 . H352 . O30 2_545 128.08(7) 0.974 2.559 3.251(3)    yes
C39 . H392 . O41 2_555 166.85(6) 0.974 2.451 3.406(3)    yes
C52 . H523 . O37 2_645 154.40(7) 0.966 2.548 3.445(3)    yes
C56 . H562 . O53 . 124.63(5) 0.989 2.512 3.180(3)    yes
C78 . H783 . O53 1_455 139.29(7) 0.966 2.577 3.369(3)    yes
C78 . H782 . O59 1_455 142.10(6) 0.983 2.532 3.362(3)    yes
C79 . H791 . O10 1_455 152.30(6) 0.961 2.540 3.421(3)    yes


_iucr_refine_instruction_details_constraints
;
#
# Punched on 17/05/13 at 13:37:30
#
#LIST     12                                                                    
BLOCK SCALE X'S, U'S 
RIDE C   (   5,X'S) H   (  51,X'S) 
RIDE C   (   7,X'S) H   (  71,X'S) 
RIDE C   (   8,X'S) H   (  81,X'S) 
RIDE C   (  11,X'S) H   ( 111,X'S) H   ( 112,X'S) H   ( 113,X'S) 
RIDE C   (  12,X'S) H   ( 121,X'S) 
RIDE C   (  13,X'S) H   ( 131,X'S) 
RIDE C   (  17,X'S) H   ( 171,X'S) 
RIDE C   (  18,X'S) H   ( 181,X'S) H   ( 182,X'S) H   ( 183,X'S) 
RIDE C   (  19,X'S) H   ( 193,X'S) H   ( 192,X'S) H   ( 191,X'S) 
RIDE C   (  23,X'S) H   ( 231,X'S) 
RIDE C   (  24,X'S) H   ( 241,X'S) 
RIDE C   (  25,X'S) H   ( 251,X'S) 
RIDE C   (  26,X'S) H   ( 261,X'S) 
RIDE C   (  27,X'S) H   ( 271,X'S) H   ( 272,X'S) 
RIDE C   (  28,X'S) H   ( 281,X'S) H   ( 282,X'S) 
RIDE C   (  31,X'S) H   ( 311,X'S) H   ( 312,X'S) H   ( 313,X'S) 
RIDE C   (  34,X'S) H   ( 341,X'S) 
RIDE C   (  35,X'S) H   ( 353,X'S) H   ( 352,X'S) H   ( 351,X'S) 
RIDE C   (  36,X'S) H   ( 363,X'S) H   ( 362,X'S) H   ( 361,X'S) 
RIDE C   (  38,X'S) H   ( 381,X'S) 
RIDE C   (  39,X'S) H   ( 391,X'S) H   ( 392,X'S) H   ( 393,X'S) 
RIDE C   (  40,X'S) H   ( 403,X'S) H   ( 402,X'S) H   ( 401,X'S) 
RIDE C   (  44,X'S) H   ( 441,X'S) 
RIDE C   (  45,X'S) H   ( 453,X'S) H   ( 452,X'S) H   ( 451,X'S) 
RIDE C   (  46,X'S) H   ( 461,X'S) H   ( 462,X'S) H   ( 463,X'S) 
RIDE C   (  50,X'S) H   ( 501,X'S) 
RIDE C   (  51,X'S) H   ( 511,X'S) H   ( 512,X'S) H   ( 513,X'S) 
RIDE C   (  52,X'S) H   ( 523,X'S) H   ( 522,X'S) H   ( 521,X'S) 
RIDE C   (  54,X'S) H   ( 541,X'S) 
RIDE C   (  56,X'S) H   ( 561,X'S) H   ( 562,X'S) 
RIDE C   (  57,X'S) H   ( 571,X'S) H   ( 572,X'S) 
RIDE C   (  60,X'S) H   ( 602,X'S) H   ( 603,X'S) H   ( 601,X'S) 
RIDE C   (  64,X'S) H   ( 641,X'S) 
RIDE C   (  65,X'S) H   ( 652,X'S) H   ( 651,X'S) H   ( 653,X'S) 
RIDE C   (  66,X'S) H   ( 661,X'S) H   ( 662,X'S) H   ( 663,X'S) 
RIDE C   (  69,X'S) H   ( 691,X'S) 
RIDE C   (  70,X'S) H   ( 701,X'S) 
RIDE C   (  71,X'S) H   ( 711,X'S) 
RIDE C   (  72,X'S) H   ( 721,X'S) 
RIDE C   (  74,X'S) H   ( 741,X'S) 
RIDE C   (  75,X'S) H   ( 751,X'S) 
RIDE C   (  78,X'S) H   ( 783,X'S) H   ( 782,X'S) H   ( 781,X'S) 
RIDE C   (  79,X'S) H   ( 791,X'S) 
RIDE C   (  80,X'S) H   ( 801,X'S) 
END                                                                             
;


_iucr_refine_instruction_details_restraints
;
#
# Punched on 17/05/13 at 13:37:30
#
#LIST     16                                                                    
NO 
REM   HREST   START (DO NOT REMOVE THIS LINE) 
REM   HREST   END (DO NOT REMOVE THIS LINE) 
END                                                                             
;
