# Supplementary material for: Catalytic enantioselective synthesis of indanes by a cation-directed 5-endo-trig cyclization
Source: Springer Nature journal article supplement (doi:10.1038/nchem.2150), 2015-01-12
Supplement: 41557_2015_BFnchem2150_MOESM42_ESM.mol [file 41557_2015_BFnchem2150_MOESM42_ESM.mol]

  ChemDraw12171405432D

 40 42  0  0  0  0  0  0  0  0999 V2000
    1.6815   -1.3715    0.0000 C   0  0  0  0  0  0  0  0  0  0  0  0
    0.8846   -1.5850    0.0000 C   0  0  0  0  0  0  0  0  0  0  0  0
    0.3013   -1.0017    0.0000 C   0  0  0  0  0  0  0  0  0  0  0  0
   -0.4833   -1.2566    0.0000 C   0  0  0  0  0  0  0  0  0  0  0  0
   -1.0964   -0.7046    0.0000 C   0  0  0  0  0  0  0  0  0  0  0  0
   -1.2680   -1.5115    0.0000 C   0  0  0  0  0  0  0  0  0  0  0  0
   -2.0649   -1.7251    0.0000 O   0  0  0  0  0  0  0  0  0  0  0  0
   -2.2784   -2.5220    0.0000 C   0  0  0  0  0  0  0  0  0  0  0  0
   -1.6950   -3.1053    0.0000 C   0  0  0  0  0  0  0  0  0  0  0  0
   -3.0753   -2.7355    0.0000 C   0  0  0  0  0  0  0  0  0  0  0  0
   -0.6846   -2.0949    0.0000 O   0  0  0  0  0  0  0  0  0  0  0  0
   -1.8811   -0.4496    0.0000 C   0  0  0  0  0  0  0  0  0  0  0  0
   -2.5955   -0.8621    0.0000 C   0  0  0  0  0  0  0  0  0  0  0  0
   -3.3100   -0.4496    0.0000 C   0  0  0  0  0  0  0  0  0  0  0  0
   -3.3100    0.3754    0.0000 C   0  0  0  0  0  0  0  0  0  0  0  0
   -2.5955    0.7879    0.0000 C   0  0  0  0  0  0  0  0  0  0  0  0
   -1.8811    0.3754    0.0000 C   0  0  0  0  0  0  0  0  0  0  0  0
   -1.0964    0.6303    0.0000 C   0  0  0  0  0  0  0  0  0  0  0  0
   -0.3820    1.0428    0.0000 C   0  0  0  0  0  0  0  0  0  0  0  0
   -0.3820    1.8678    0.0000 O   0  0  0  0  0  0  0  0  0  0  0  0
    0.3325    2.2803    0.0000 C   0  0  0  0  0  0  0  0  0  0  0  0
    1.0470    1.8678    0.0000 C   0  0  0  0  0  0  0  0  0  0  0  0
    0.3325    3.1053    0.0000 C   0  0  0  0  0  0  0  0  0  0  0  0
    0.1539    0.7334    0.0000 O   0  0  0  0  0  0  0  0  0  0  0  0
   -1.4055    1.3952    0.0000 C   0  0  0  0  0  0  0  0  0  0  0  0
   -2.2225    1.5101    0.0000 O   0  0  0  0  0  0  0  0  0  0  0  0
   -2.5315    2.2750    0.0000 C   0  0  0  0  0  0  0  0  0  0  0  0
   -2.0236    2.9251    0.0000 C   0  0  0  0  0  0  0  0  0  0  0  0
   -3.3485    2.3898    0.0000 C   0  0  0  0  0  0  0  0  0  0  0  0
   -0.8976    2.0453    0.0000 O   0  0  0  0  0  0  0  0  0  0  0  0
   -0.6115   -0.0371    0.0000 C   0  0  0  0  0  0  0  0  0  0  0  0
    0.4610   -0.0371    0.0000 C   0  0  0  0  0  0  0  0  0  0  0  0
    0.8735   -0.7516    0.0000 C   0  0  0  0  0  0  0  0  0  0  0  0
    1.6985   -0.7516    0.0000 C   0  0  0  0  0  0  0  0  0  0  0  0
    2.1110   -0.0371    0.0000 C   0  0  0  0  0  0  0  0  0  0  0  0
    2.9360   -0.0371    0.0000 O   0  0  0  0  0  0  0  0  0  0  0  0
    3.3485   -0.7516    0.0000 C   0  0  0  0  0  0  0  0  0  0  0  0
    1.6985    0.6773    0.0000 C   0  0  0  0  0  0  0  0  0  0  0  0
    0.8735    0.6773    0.0000 C   0  0  0  0  0  0  0  0  0  0  0  0
    0.6711   -2.3819    0.0000 O   0  0  0  0  0  0  0  0  0  0  0  0
  1  2  1  0      
  2  3  1  0      
  3  4  1  0      
  5  4  1  6      
  5  6  1  1      
  6  7  1  0      
  7  8  1  0      
  8  9  1  0      
  8 10  1  0      
  6 11  2  0      
  5 12  1  0      
 12 13  2  0      
 13 14  1  0      
 14 15  2  0      
 15 16  1  0      
 16 17  2  0      
 12 17  1  0      
 17 18  1  0      
 18 19  1  0      
 19 20  1  0      
 20 21  1  0      
 21 22  1  0      
 21 23  1  0      
 19 24  2  0      
 18 25  1  0      
 25 26  1  0      
 26 27  1  0      
 27 28  1  0      
 27 29  1  0      
 25 30  2  0      
 18 31  1  0      
  5 31  1  0      
 31 32  1  1      
 32 33  2  0      
 33 34  1  0      
 34 35  2  0      
 35 36  1  0      
 36 37  1  0      
 35 38  1  0      
 38 39  2  0      
 32 39  1  0      
  2 40  2  0      
M  END
